# Supplementary material
Source: PubMed Central journal article supplement (PMC2409017)
Supplement: pp.108.117614_2.pdf [file pp.108.117614_2.pdf]

Supplemental Figure S2. HPLC separation of the tocochromanol standards.  $\alpha$ ,  $\gamma$  and  $\delta$  are  $\alpha$ -,  $\gamma$ - and  $\delta$ -tocopherol, respectively.  $\alpha$ -T and  $\gamma$ -T and  $\delta$ T are  $\alpha$ -tocotrienol,  $\gamma$ -tocotrienol and  $\delta$ -tocotrienol, respectively.

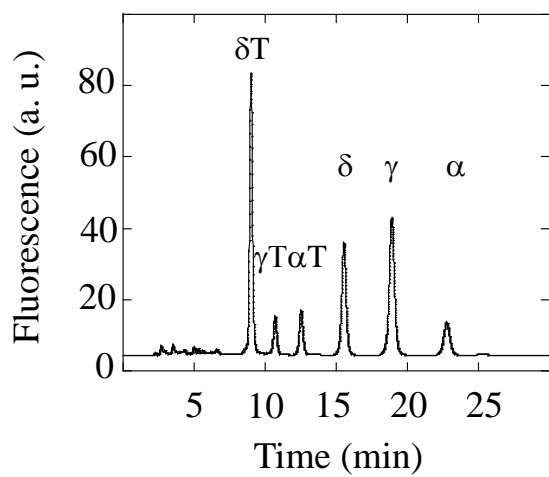

Fig S2
