# Supplementary material
Source: PubMed Central journal article supplement (PMC2409017)
Supplement: pp.108.117614_3.pdf [file pp.108.117614_3.pdf]

Supplemental Figure S3. Chromatograms of vitamin E, and vitamin E composition in plastoglobules purified from intact chloroplasts of old and senescing leaves of WT plants. A similar profile was obtained when plastoglobules were prepared following the protocol of Vidi et al. (2006).  $\alpha$ ,  $\gamma$  and  $\delta$  are  $\alpha$ -,  $\gamma$ - and  $\delta$ -tocopherol, respectively.

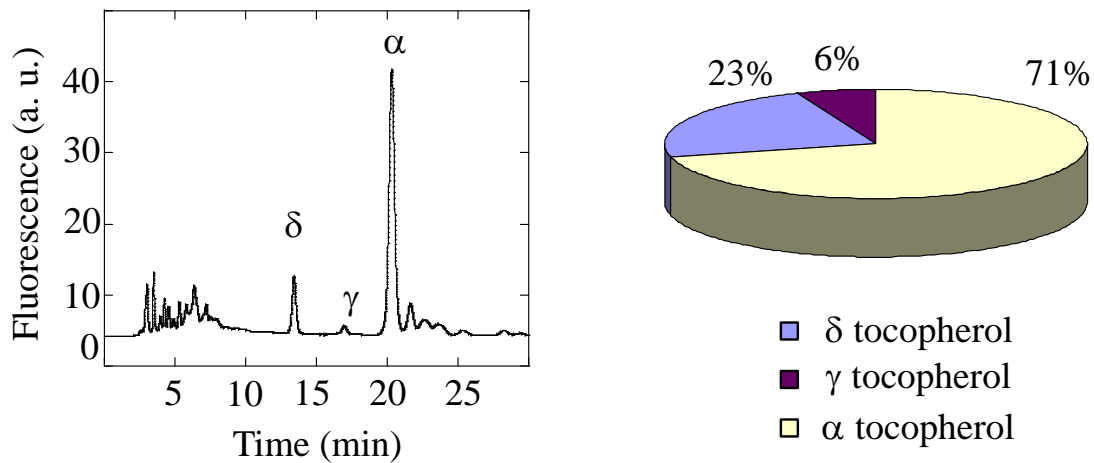

Fig. S3
